# Supplementary material
Source: PubMed Central journal article supplement (PMC3457509)
Supplement: AEM.01587-12_zam999103724so1.pdf [file AEM.01587-12_zam999103724so1.pdf]

Supplementary Material:

Engineering a cyanobacterial cell factory for the production of lactic acid

S. Andreas Angermayr, Michal Paszota and Klaas J. Hellingwerf

### Calculations:

The following values were taken from the literature: The maximal rate of fixation of carbon of 3.70 mmol/gDW/h (2, 3) was derived from the maximal growth rate of the organism of 0.085 h<sup>-1</sup> (1). This translates into 0.085 g/gDW/h. Assuming an average cellular composition of C<sub>4</sub>H<sub>7</sub>O<sub>2</sub>N (corresponding to a M<sub>w</sub> of 101,10) we derive a Q<sub>biomass</sub> of 0.86 mmol biomass/gDW/h, which in turn, when taking into account that 4 mole of CO<sub>2</sub> are necessary to form 1 mole of C<sub>4</sub>H<sub>7</sub>O<sub>2</sub>N, leads to a CO<sub>2</sub> fixation rate (Q<sub>CO<sub>2</sub></sub>) of 3.44 mmolC/gDW/h; Nonetheless as maximal fixation rate we adopt the slightly higher rate reported in (3), which was derived from their own experimental data. The determined capacity of CO<sub>2</sub> fixation for a *Synechocystis* strain at its respective maximum growth rate can be expressed as minimally required enzymatic activity of the CO<sub>2</sub> fixing enzyme Ribulose-1,5-Bisphosphate Carboxylase Oxygenase. Enzymatic activities (Table 2) can be expressed in relation to that activity.

For the calculations on the carbon partitioning we used our measured values of the highest growth rate, which were determined from the exponential growth phase, and the highest rate of lactic acid production, which was determined from the late-exponential growth phase (note that higher values for the partitioning of CO<sub>2</sub> over product *versus* biomass would be obtained, if the actual growth rate during the late-exponential growth phase would be chosen). For the synthesis of 1 mole of biomass and lactic acid 4 and 3 moles of carbon are needed, respectively. Enzyme activities (*i.e.* V<sub>max</sub> values) are expressed in mmol/gDW/h or in mmol C/gDW/h, thereby taking into account that protein contributes 51 % to the biomass composition of *Synechocystis* (3).

Supplementary Figure 1: Sub-culturing and production stability in engineered mutant strains.

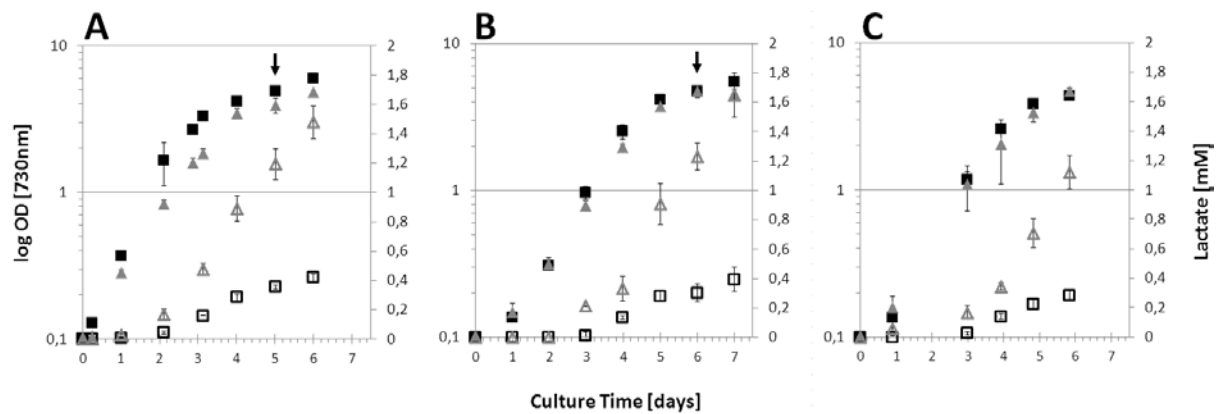

Legend to Supplementary Figure 1: Build-up of the extracellular lactic acid concentration during sub-culturing experiments in batch cultures of engineered *Synechocystis* strains verified the stability of the capacity to produce lactic acid. Cells were grown in BG-11 medium supplemented with 50 mM NaHCO<sub>3</sub>. Filled symbols represent the OD<sub>730</sub>; open symbols represent the lactate concentration. SAA015, the strain with integrated *B. subtilis ldh*, is represented by squares; SAA017, the strain with integrated *B. subtilis ldh* and *P. aeruginosa sth*, is represented by triangles. Values are the average of biological replicates; error bars indicate the standard deviation (n=3); if error bars are not visible they are smaller than the data point symbol. (A) First batch cultivation; (B) second subsequent batch cultivation; and (C) third subsequent batch cultivation. The arrows indicate the time point when cells were transferred to fresh medium with a starting OD<sub>730</sub> of 0.1.

Supplementary Figure 2: Transhydrogenase activity in wild type *Synechocystis*, SAA015 and SAA017.

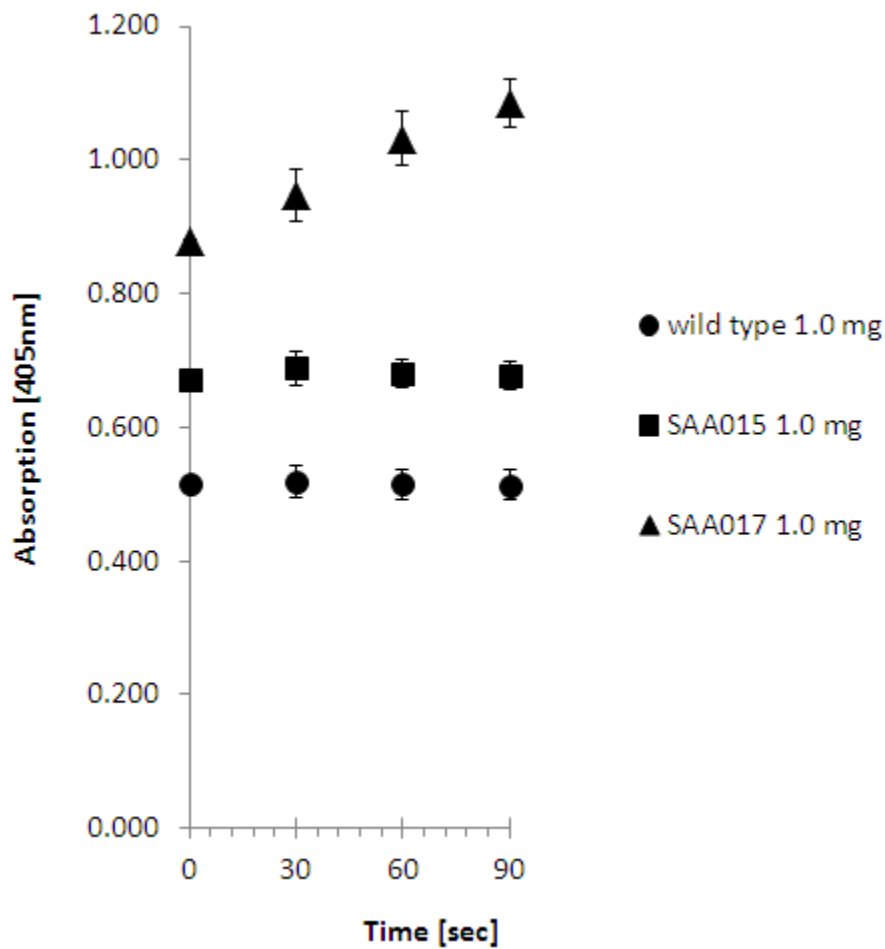

Legend to Supplementary Figure 2: Activity of the soluble transhydrogenase in crude cell-free extract of wild type *Synechocystis* (circles), SAA015 (squares) and SAA017 (triangles). Only SAA017, the strain with integrated *B. subtilis ldh* and *P. aeruginosa sth*, showed significant activity. Values are the average of biological replicates; error bars indicate the standard deviation (n=3); if error bars are not visible they are smaller than the data point symbol.

Supplementary Figure 3: Lactate toxicity assay.

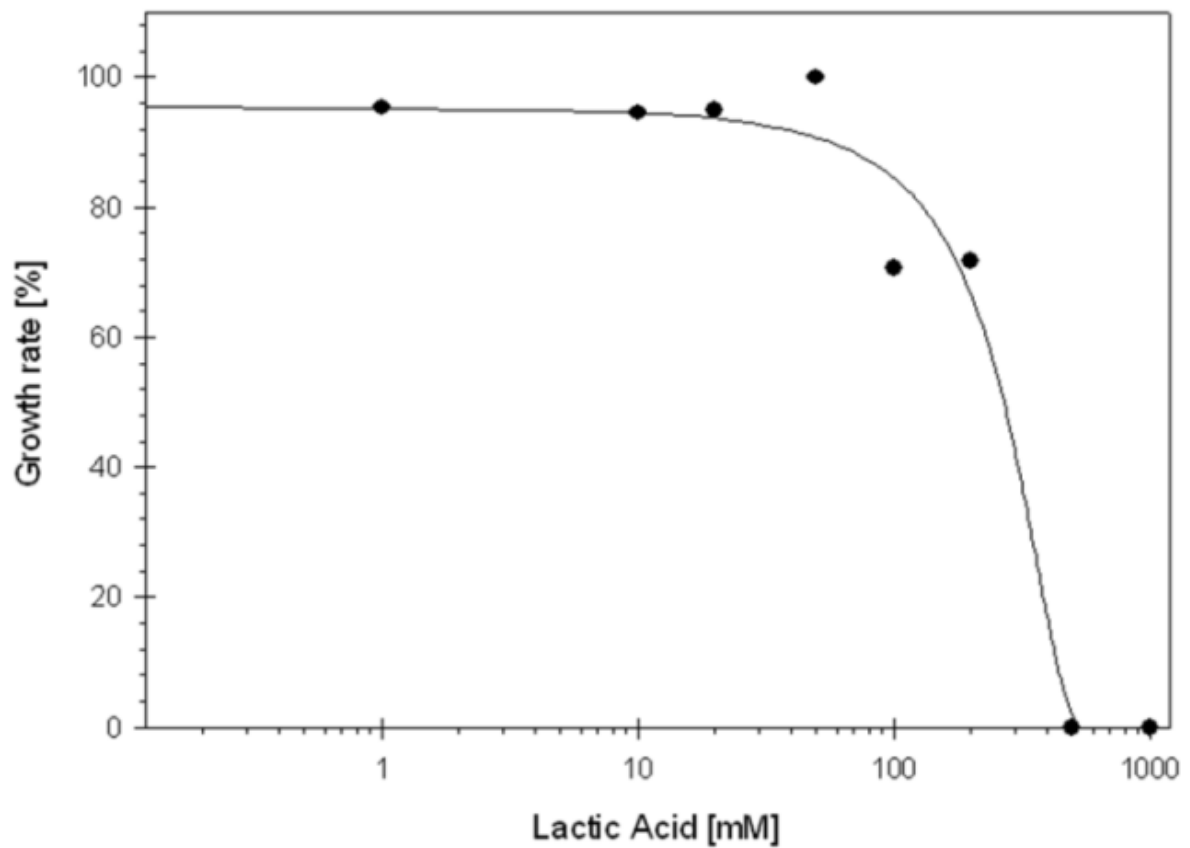

Supplementary Figure 3: Determining the toxicity of a D/L-lactic acid racemic mixture, added to the growth medium of *Synechocystis*. Using the Sigma Plot Software Package an IC<sub>50</sub> (50 % growth rate reduction) of 235 mM can be determined.

Supplementary Table 1: Primers used in this study.

| Primer     | Sequence 5'-3'                                                           | Purpose                                      |
|------------|--------------------------------------------------------------------------|----------------------------------------------|
| ecl dhA_F  | GCGGAATTCGCGGCCGCTTCTAGAGGAG<br>GACTAGCATGAAACTCGCCGTTTATAGC             | Fw for the <i>E. coli</i> <i>ldhA</i>        |
| ecl dhA_R  | GCGCTGCAGCGGCCGCTACTAGTATTAAA<br>CCAGTTCGTTCCGGGC                        | Rv for the <i>E. coli</i> <i>ldhA</i>        |
| bsldh_F    | GCGGAATTCGCGGCCGCTTCTAGAGGAG<br>GACTAGCATGATGAACAAACATGTAAAT<br>AAAGTAGC | Fw for the <i>B. subtilis</i> <i>ldh</i>     |
| bsldh_R    | GCGCTGCAGCGGCCGCTACTAGTATTAGT<br>TGACTTTTTGTTCTGCAAAATG                  | Rv for the <i>B. subtilis</i> <i>ldh</i>     |
| llldh_F    | GCGGAATTCGCGGCCGCTTCTAGAGGAG<br>GACTAGCATGGCTGATAAACAACGTAAA<br>AAAG     | Fw for the <i>L. lactis</i> <i>ldh</i>       |
| lldh_R_II  | GCGCTGCAGCGGCCGCTACTAGTATTAGT<br>TTTTAACTGCGGAAGC                        | Rv for the <i>L. lactis</i> <i>ldh</i>       |
| pasth_F    | AATGAATTCGCGGCCGCTTCTAGAGATGG<br>CTGTCTACAACACTACGACGTG                  | Fw for the <i>P. aeruginosa</i> <i>sth</i>   |
| pasth_R_II | AATCTGCAGCGGCCGCTACTAGTATCAAA<br>AAAGCCGGTTGAGGC                         | Rv for the <i>P. aeruginosa</i> <i>sth</i>   |
| avsth_F    | AATGAATTCGCGGCCGCTTCTAGAGGAG<br>GACTAGCATGGCTGTATATAACTACGATG<br>TGGTG   | Fw for the <i>A. vinelandii</i> <i>sth</i>   |
| avsth_R    | AATCTGCAGCGGCCGCTACTAGTATCAAA<br>AAAGCCGATTGAGACC                        | Rv for the <i>A. vinelandii</i> <i>sth</i>   |
| SEQtrc_F   | GACGTAATACGACTCACTATAGGGCG                                               | Fw for verification in the $P_{trc}$ plasmid |
| SEQtrc_R   | AGGTTTCCCGACTGGAAAGC                                                     | Rv for verification in the $P_{trc}$ plasmid |
| V_R        | TGCCACCTGACGTCTAAGAA                                                     | Fw for verification of BioBricks             |
| V_F        | ATTACCGCCTTTGAGTGAGC                                                     | Rv for verification of BioBricks             |
| H1_SacI_F  | AAATGAGCTCCCTTTGACAACAATGTGGC                                            | Fw for the Hom1 region                       |

|            |                                        |                                               |
|------------|----------------------------------------|-----------------------------------------------|
|            | CT                                     |                                               |
| H1_SacII_R | AAAACCGCGGCCATATAAATCCCCGCCA<br>CT     | Rv for the Hom1 region                        |
| H2_Xho_F   | AAATCTCGAGAGACCAAGCCCAATTCGT<br>TTG    | Fw for the Hom2 region                        |
| H2_Kpn_R   | AAATGGTACCGCTAAACCCACCTCTTGCC<br>CAAT  | Rv for the Hom2 region                        |
| Kan903_F   | AAATGTCGACAAAGCCACGTTGTGTCTCA<br>AAATC | Fw for the Kan <sup>R</sup> cassette          |
| Kan903_R   | AAATGTCGACCGCTGAGGTCTGCCTCGTG<br>AA    | Rv for the Kan <sup>R</sup> cassette          |
| T7_long    | GTAATACGACTCACTATAGGGCGAATTG<br>GG     | Fw for verification of inserts in pBSK+       |
| T3_long    | AATTAACCCTCACTAAAGGGAACAAAAG<br>CTGG   | Rv for verification of inserts in pBSK+       |
| H1_seg_F   | TGTCGCCGCTAAGTTAGA                     | Fw for segregation verification in colony PCR |
| H2_seg_R   | CTGTGGGTAGTAACTGGC                     | Rv for segregation verification in colony PCR |

1. **Emlyn-Jones D., M. K. Ashby, and C. W. Mullineaux.** 1999. A gene required for the regulation of photosynthetic light harvesting in the cyanobacterium *Synechocystis* 6803. *Mol. Microbiol.* **33**:1050–1058.
2. **Nogales J., S. Gudmundsson, E. M. Knight, B. O. Palsson, and I. Thiele.** 2012. Detailing the Optimality of Photosynthesis in Cyanobacteria Through Systems Biology Analysis. *PNAS*.
3. **Shastri A. A., and J. A. Morgan.** 2005. Flux balance analysis of photoautotrophic metabolism. *Biotechnol. Prog.* **21**:1617–1626.
